# Supplementary material for: Outcome after intracranial haemorrhage from dural arteriovenous fistulae; a systematic review and case-series
Source: Springer Nature journal article supplement (doi:10.1007/s00415-015-7898-x), 2015-09-26
Supplement: MOESM1 [file 8460510]

**SUPPLEMENTARY MATERIAL**

**Supplementary figure 1. Flow chart systematic literature search (search date: 16 April 2015)**

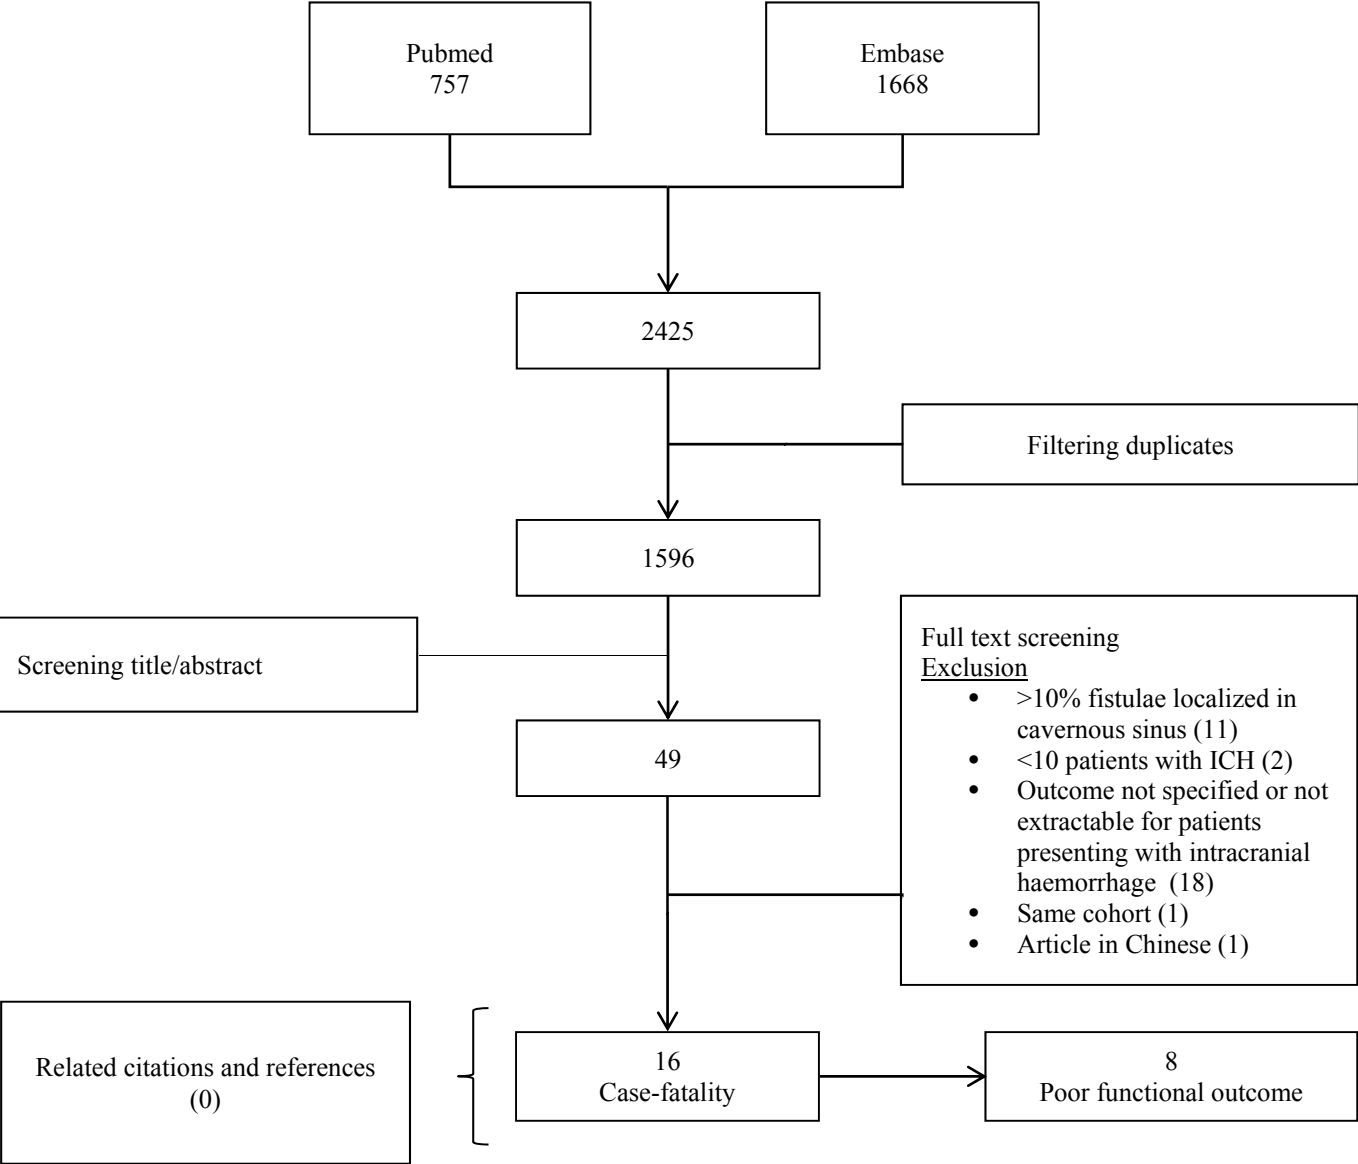

**Supplementary table 1. Search strategy for studies of dural arteriovenous fistulae presenting with intracranial haemorrhage**

Pubmed:

#1:haemorrhage OR hemorrhage OR  
hematoma OR haematoma OR bleeding  
OR haemorrhagic stroke OR hemorrhagic  
stroke

#2: dura OR dural

#3: arteriovenous fistul\* OR arterio venous  
fistul\* OR arteriovenous shunt\* OR arterio  
venous shunt\* OR arteriovenous  
malformation\* OR arterio venous  
malformation\* OR arteriovenous fistulous  
malformation\* OR arterio venous fistulous  
malformation\* OR avfistul\* OR av shunt\*  
OR avf\* OR avfm\* OR avs

#4: #2 AND #3

#5: DAVF\* OR DAVFM OR ICDAVF  
OR DAVM\*

#6: #4 OR #5

#7: #1 AND #6

Embase:

#1:'haemorrhage' OR 'hemorrhage' OR  
'hematoma' OR 'haematoma' OR  
'bleeding' OR 'haemorrhagic stroke' OR  
'hemorrhagic stroke'

#2: 'dura' OR 'dural'

#3: 'arteriovenous' OR 'arterio venous'  
OR 'av'

#4: 'fistula' OR 'fistulae' OR 'fistulas' OR  
'shunt' OR 'shunts' OR 'malformation'  
OR 'malformations' OR 'fistulous  
malformation' OR 'fistulous  
malformations'

#5: #2 AND #3 AND #4

#6: 'DAVF' OR 'DAVFS' OR 'DAVFM'  
OR 'DAVFMS' OR ICDAVF OR  
'ICDAVFS' OR 'DAVM' OR 'DAVMS'  
OR 'AVF' OR 'AVFS' OR 'AVFM' OR  
'AVFMS' OR 'AVS'

#7: #5 OR #6

#8: #1 AND #7

| Study (First author, year of publication) | Study characteristics |                  |                                                      | Design | Sample size              |                                        | Characteristics    |            | Location of intracranial haemorrhage |       |     |     | Treatment |              |         |              | Follow up |                                    |                                                                 | Outcome                        |                                                            |                    |                                                                |
|-------------------------------------------|-----------------------|------------------|------------------------------------------------------|--------|--------------------------|----------------------------------------|--------------------|------------|--------------------------------------|-------|-----|-----|-----------|--------------|---------|--------------|-----------|------------------------------------|-----------------------------------------------------------------|--------------------------------|------------------------------------------------------------|--------------------|----------------------------------------------------------------|
|                                           | Country of Origin     | Inclusion period | Inclusion criteria                                   |        | Total number of patients | Patients with intracranial haemorrhage | Mean age (range) * | Male (%) * | ICH (no. infratentorial)             | SAH   | SDH | IVH | Untreated | Endovascular | Surgery | Radiotherapy | Multiple  | Follow up period (months, range) * | FU period for intracranial haemorrhage patients (months, range) | Patients lost to follow up (%) | Case fatality after intracranial haemorrhage, % (95% CI) † | Predefined outcome | Poor clinical outcome % mRS $\geq 3$ , GOS $\leq 3$ (95% CI) ‡ |
| Jolink 2015                               | The Netherlands       | 2007-2012        | Presentation with intracranial haemorrhage           | RS     | 29                       | 29                                     | 59 (42-74)         | 17 (59)    | 18 (11) §                            | 13    | 0   | 11  | 3         | 22           | 11      | 0            | 7         | 5 months (0 - 12 months)           | 5 months (0-12 months)                                          | 0                              | 10 (2.2 - 27)                                              | mRS                | 14 (3.9 - 32)                                                  |
| Al-Mahfoudh 2014                          | UK, Ireland           | 2002-2012        | Surgical therapy                                     | PS     | 25                       | 16                                     | 57 (23-76)         | 19 (76)    | 14                                   | 5     | 0   | 1   | 0         | 8            | 25      | 0            | 8         | 67 months (24-102 months)          | -                                                               | 0                              | 0 (0 - 20.6 )                                              | -                  | NRS                                                            |
| Chandra 2014                              | USA                   | 2006-2012        | Endovascular therapy                                 | RS     | 40                       | 13                                     | 57 (30-79)         | 21 (53)    | NR                                   |       |     |     | 0         | 40           | 0       | 0            | 0         | 28.3 months (12-63 months)         | -                                                               | 27                             | 0 (0 - 24.7)                                               | -                  | NRS                                                            |
| Li 2014                                   | China                 | 2009-2013        | Haemorrhagic DAVFs managed with endovascular therapy | RS     | 46                       | 46                                     | 47 (23-68)         | 39 (85)    | 35 #                                 | 11    | 2   | 8   | 0         | 46           | 0       | 7            | 7         | 20 months                          | 20 months                                                       | 4                              | 0 (0 - 7.7)                                                | mRS                | 13 (4.9 - 26.3 )                                               |
| Eftekhar 2013                             | Australia             | 1991-2011        | Surgical treatment transverse sigmoid sinus DAVFs    | RS     | 42                       | 15                                     | 59 (32-78)         | 20 (48)    | NR                                   |       |     |     | 0         | 0            | 42      | 0            | 0         | 18 months (2-82 months)            | -                                                               |                                | 6,7 (0.2 - 32)                                             | -                  | NRS                                                            |
| Daniels 2013                              | USA                   | 1996-2012        | Presentation with intracranial haemorrhage           | RS     | 28                       | 28                                     | 56,5               | 24 (86)    | 20 **                                | 6     | 5   | 9   | 2         | 20           | 12      | 1            | 7         | 17 months                          | 17 months                                                       | 4                              | 10.7 (2.3 - 28.2)                                          | mRS                | 28.6 (13.2 - 48.7)                                             |
| Wachter 2011                              | Germany               | 1990-2010        | Surgical therapy                                     | RS     | 42                       | 16                                     | 58 (35-72)         | 33 (79)    | NR                                   |       |     |     | 0         | 0            | 42      | 0            | 0         | 50 months (2 - 120 months)         | -                                                               | 0                              | 0 (0 - 20.6)                                               | -                  | NRS                                                            |
| Guedin 2010                               | France                | 1990-2008        | ICDAVFs with CVR                                     | RS     | 53                       | 19                                     | 52 (6-85)          | 35 (66)    | 13                                   | 5     | 0   | 1   | 4         | 46           | 4       | 0            | 1         | 3-6 months                         | -                                                               | 2                              | 5.3 (0.1 - 26)                                             | -                  | NRS                                                            |
| Huang 2009                                | China                 | 2005-2008        | TDAVFs with endovascular therapy                     | RS     | 14                       | 12                                     | 50 (37-65)         | 13 (93)    | 0                                    | 10 †† | 0   | 4   | 0         | 14           | 0       | 0            | 0         | 3 - 24 months                      | 7.5 months (1-12 months)                                        | 0                              | 8.3 (0.2 - 39)                                             | -                  | 8.3 (0.2 - 39)                                                 |

|                   |                    |                |                                                    |    |    |    |                |         |           |   |   |   |   |    |    |   |                                 |                                    |                                   |                 |                    |                 |                    |
|-------------------|--------------------|----------------|----------------------------------------------------|----|----|----|----------------|---------|-----------|---|---|---|---|----|----|---|---------------------------------|------------------------------------|-----------------------------------|-----------------|--------------------|-----------------|--------------------|
| Liu<br>2009       | USA                | 1993 -<br>2007 | Surgical<br>therapy                                | RS | 23 | 13 | 59 (23-<br>78) | 15 (65) | NR        |   |   |   |   |    |    |   | 45 months<br>(2 - 84<br>months) | -                                  | 0                                 | 0<br>(0 - 24.7) | GOS                | 0<br>(0 - 24.7) |                    |
| Lv<br>2009        | China              | 2005-2008      | ICDAVFs<br>with<br>endovascular<br>therapy         | RS | 40 | 16 | 43 (23-<br>60) | 29 (73) | NR        |   |   |   |   |    |    |   | 8 months<br>(1 - 16<br>months)  | -                                  | 0                                 | 0<br>(0 - 20.6) | mRS                | 0<br>(0 - 20.6) |                    |
| Cognard<br>2008   | France             | 2003-2006      | DAVF <sup>*</sup> with<br>CVR with<br>onyx therapy | PS | 30 | 16 | 62 (36-<br>76) | 18 (60) | 14        | 2 | 0 | 0 | 0 | 30 | 2  | 2 | 4                               | 3 months<br>(3-24<br>months)       | -                                 | 0               | 6.3<br>(0.2 - 30)  | -               | NRS                |
| Lawton<br>2008    | USA                | 1997-2006      | TDAVFs with<br>microsurgical<br>therapy            | RS | 31 | 17 | 53 (25-<br>87) | 21 (68) | 11 ‡‡     | 7 | 0 | 0 | 0 | 31 | 31 | 0 | 31                              | 50 months<br>(1 - 108<br>months)   | -                                 | 0               | 0<br>(0 - 19.5)    | mRS             | 0<br>(0 - 19.5)    |
| Kakarla<br>2007   | USA                | 1995 -<br>2004 | High risk<br>DAVFs<br>with surgery                 | RS | 53 | 22 | 54 (4-85)      | 37 (70) | NR        |   |   |   |   |    |    |   |                                 | 12 months<br>(0 - 84<br>months)    | -                                 | 2               | 0<br>(0 - 15.4)    | GOS             | 0<br>(0- 1 5.4)    |
| Van Rooij<br>2007 | The<br>Netherlands | 1994-2006      | DAVFs<br>Borden type<br>III                        | RS | 29 | 18 | 54 (24-<br>77) | 24 (83) | 16 (4) §§ | 2 | 1 | 0 | 2 | 21 | 12 | 1 | 7                               | 6-12 weeks                         | -                                 | NR              | 0<br>(0 - 18.5)    | -               | NRS                |
| Tomak<br>2003     | USA                | 1988-2000      | Symptomatic<br>TDAVFs                              | RS | 22 | 10 | 50 (35-<br>80) | 16 (73) | 4         | 5 | 0 | 2 | 0 | 20 | 12 | 0 | 10                              | 11.5 months<br>(1 - 123<br>months) | -                                 | 0               | 10.0<br>(0.3 - 45) | GOS             | 10.0<br>(0.3 - 45) |
| Duffau<br>1999    | France             | 1987-1997      | ICDAVF's<br>with<br>haemorrhagic<br>presentation   | RS | 20 | 20 | 54 (42-<br>74) | 17 (85) | 16 (2) ## | 3 | 4 | 0 | 0 | 9  | 18 | 1 | 8                               | 10 months<br>(0.3 - 25<br>months)  | 10 months<br>(0.3 - 25<br>months) | 0               | 15<br>(3.2 - 38)   | -               | NRS                |

**Supplementary Table 2. Characteristics of included studies for patients with DAVF presenting with intracranial haemorrhage, including our own cohort of 29 patients**

CI indicates confidence interval; CVR, cortical venous reflux; DAVF, dural arteriovenous fistula; GOS, Glasgow Outcome Scale; ICDAVF, intracranial dural arteriovenous fistula; ICH, intracerebral haemorrhage; IVH, intraventricular haemorrhage; mRS, modified Rankin Scale; NR, not reported; NRS, not reported specifically for patients presenting with intracranial haemorrhage; PS, prospective analysis; RS, retrospective analysis; SAH, subarachnoid haemorrhage; SDH, subdural haemorrhage; and TDAVF, tentorial dural arteriovenous fistula.

†Case fatality only for patients with a DAVF presenting with intracranial haemorrhage, ‡Poor outcome (mRS  $\geq 3$  or GOS  $\leq 3$ ) only for patients with a DAVF presenting with intracranial haemorrhage, § ICH 7 patients, SAH 6 patients, IVH 3 patients, ICH + SAH 5 patients, ICH + IVH 6 patients, IVH + SAH 2 patients, || ICH 10 patients, SAH 2 patients, ICH+SAH 3 patients, ICH+IVH 1 patient, # ICH 28 patient, SAH 11 patients, SDH 2 patients, IVH 8 patients, ICH + IVH 7 patients, \*\* Combination of haemorrhages not reported, †† SAH 8 patients, IVH 2 patients, IVH + SAH 2 patients, ‡‡ ICH 10 patients, SAH 6 patients, ICH + SAH 1 patient, §§ ICH 15 patients, SAH 2 patients, ICH + SDH 1 patient, || || SAH 4 patients, IVH 1 patient, SAH + IVH 1 patient, ## ICH 13 patients, SAH 2 patients, SDH 2 patients, ICH + SAH 1 patient, ICH + SDH 2 patients
